# Supplementary material for: Characterization of N⋯O non-covalent interactions involving σ-holes: “electrostatics” or “dispersion”
Source: Royal Society of Chemistry journal article supplement (doi:10.1039/c6cp05899j), 2016-01-01
Supplement: c6cp05899j1.pdf [file c6cp05899j1.pdf]

## Characterization of N...O non-covalent interactions involving $\sigma$ -hole: “Electrostatics” or “dispersion”

Rahul Shukla<sup>a</sup> and Deepak Chopra<sup>\*a</sup>

*Crystallography and Crystal Chemistry Laboratory, Department of Chemistry,  
Indian Institute of Science Education and Research Bhopal,*

*Bhopal By-pass Road, Bhauri*

*Bhopal-462066, Madhya Pradesh, India*

*Email: [dchopra@iiserb.ac.in](mailto:dchopra@iiserb.ac.in); Fax: +91 755 6692392*

### Coordinates of the optimized geometry

#### NO1

O 8.0 -1.76300 0.16710 -0.61940  
F 9.0 -1.92550 -1.18470 -0.27840  
F 9.0 -2.11770 0.83430 0.56310  
N 7.0 1.23500 -0.20120 -0.25570  
F 9.0 2.57340 -0.48180 -0.15960  
F 9.0 1.24640 1.15970 -0.42250  
F 9.0 0.82990 -0.31950 1.04690

#### NO2

O 8.0 -1.88930 0.26790 -0.59110  
F 9.0 -2.23790 -1.08390 -0.45130  
F 9.0 -2.23040 0.81170 0.65760  
N 7.0 1.01330 -0.49550 -0.23770  
F 9.0 2.26590 -1.09000 -0.21110  
F 9.0 0.53760 -0.79980 1.02750  
Cl 17.0 1.35320 1.22250 -0.16540

#### NO3

O 8.0 1.91570 0.47700 0.46700  
F 9.0 2.26960 -0.79300 0.94830  
F 9.0 2.62860 0.56510 -0.74030  
N 7.0 -0.97490 -0.14790 0.48880  
F 9.0 -2.25450 -0.52020 0.94550  
Cl 17.0 -1.21900 1.45960 -0.17160  
Cl 17.0 -0.68070 -1.22710 -0.86010

#### NO4

O 8.0 -2.07250 0.15220 -0.32430  
F 9.0 -2.20780 -1.22620 -0.55930  
F 9.0 -3.39600 0.55270 -0.05770  
N 7.0 0.66920 -0.02660 -0.14630  
Cl 17.0 0.80340 1.67670 0.29080  
Cl 17.0 0.76930 -0.95170 1.34980

Cl 17.0 2.09380 -0.42920 -1.10110

NO5

O 8.0 1.36340 0.32070 -0.75900

N 7.0 -1.58460 0.22330 -0.21210

Cl 17.0 2.12260 -0.75340 0.28220

F 9.0 -1.10990 0.17240 1.07190

F 9.0 -1.39070 -1.06790 -0.63220

F 9.0 -2.94070 0.24770 -0.00700

F 9.0 1.45240 1.61220 -0.12610

NO6

O 8.0 1.49600 0.07710 0.83300

N 7.0 -1.47970 0.11910 0.52080

Cl 17.0 2.24340 0.63330 -0.56230

F 9.0 -1.10600 1.39280 0.11400

F 9.0 -2.86060 0.24380 0.57080

F 9.0 1.80060 -1.32970 0.90830

Cl 17.0 -1.19140 -0.88110 -0.88760

NO7

O 8.0 -1.57670 0.10390 -0.82120

N 7.0 1.35130 -0.20110 -0.47240

Cl 17.0 -2.42070 0.54610 0.56100

F 9.0 2.73690 -0.41950 -0.61280

F 9.0 -1.91240 -1.27660 -1.06160

Cl 17.0 0.92910 -1.11560 0.96280

Cl 17.0 1.24070 1.50140 -0.05640

NO8

O 8.0 -1.79540 -0.00330 -0.86370

F 9.0 -2.02190 -1.41290 -1.05920

N 7.0 1.08970 -0.10820 -0.29380

Cl 17.0 0.84170 1.61960 -0.02750

Cl 17.0 0.60620 -0.92750 1.19120

Cl 17.0 2.82930 -0.35130 -0.46860

Cl 17.0 -2.81060 0.45320 0.39310

NO9

O 8.0 1.18220 -0.02510 -0.72450

N 7.0 -1.71230 0.24720 -0.18020

Cl 17.0 1.77920 -1.29640 0.24700

Cl 17.0 1.58650 1.48500 -0.03670

F 9.0 -1.29230 -0.00780 1.09960

F 9.0 -1.73430 -1.01030 -0.72250

F 9.0 -3.04980 0.49180 0.01000

NO10

O 8.0 1.54420 0.02180 -0.72640  
 N 7.0 -1.34300 0.04420 -0.17910  
 Cl 17.0 -3.06240 0.32820 0.02860  
 Cl 17.0 2.28780 -1.16320 0.25270  
 Cl 17.0 1.74890 1.57110 -0.03800  
 F 9.0 -0.89170 -0.23980 1.10130  
 F 9.0 -1.27660 -1.20440 -0.77600

NO11

O 8.0 1.62970 -0.05620 -0.68390  
 N 7.0 -1.21760 0.21110 -0.08650  
 Cl 17.0 -1.30030 -1.47420 -0.56210  
 Cl 17.0 -2.86700 0.78030 0.10930  
 Cl 17.0 2.38530 -1.04490 0.48600  
 Cl 17.0 1.89920 1.59210 -0.32840  
 F 9.0 -0.72300 0.16290 1.23260

NO12

O 8.0 1.62970 -0.05620 -0.68390  
 N 7.0 -1.21760 0.21110 -0.08650  
 Cl 17.0 -1.30030 -1.47420 -0.56210  
 Cl 17.0 -2.86700 0.78030 0.10930  
 Cl 17.0 2.38530 -1.04490 0.48600  
 Cl 17.0 1.89920 1.59210 -0.32840  
 F 9.0 -0.72300 0.16290 1.23260

**Table S1:** Result of Energy Decomposition Analysis. All energies values are given in kcal/mol.

|             | <b>E<sub>elec</sub></b> | <b>E<sub>ex-rep</sub></b> | <b>E<sub>pol</sub></b> | <b>E<sub>diso</sub></b> | <b>E<sub>total</sub></b> |
|-------------|-------------------------|---------------------------|------------------------|-------------------------|--------------------------|
| <b>NO1</b>  | -0.38                   | 1.21                      | -0.07                  | -1.3                    | -0.54                    |
| <b>NO2</b>  | -0.58                   | 1.76                      | -0.12                  | -1.8                    | -0.74                    |
| <b>NO3</b>  | -1.07                   | 2.57                      | -0.19                  | -2.3                    | -0.99                    |
| <b>NO4</b>  | -1.63                   | 3.5                       | -0.45                  | -2.81                   | -1.39                    |
| <b>NO5</b>  | -0.86                   | 1.75                      | -0.13                  | -1.65                   | -0.89                    |
| <b>NO6</b>  | -1.31                   | 2.87                      | -0.22                  | -2.51                   | -1.17                    |
| <b>NO7</b>  | -1.58                   | 3.97                      | -0.35                  | -3.48                   | -1.44                    |
| <b>NO8</b>  | -1.6                    | 4.17                      | -0.35                  | -3.73                   | -1.51                    |
| <b>NO9</b>  | -1.15                   | 2.37                      | -0.18                  | -2.18                   | -1.14                    |
| <b>NO10</b> | -1.12                   | 2.74                      | -0.19                  | -2.65                   | -1.22                    |
| <b>NO11</b> | -1.64                   | 3.97                      | -0.31                  | -3.69                   | -1.67                    |
| <b>NO12</b> | -2.32                   | 5.58                      | -0.47                  | -4.96                   | -2.17                    |

**Table S2:** Topological parameters of O...Cl contacts.

| BPL (Å) | $\rho(e/\text{Å}^3)$ | $\nabla^2\rho(e/\text{Å}^5)$ | $ V_b /G_b$ |
|---------|----------------------|------------------------------|-------------|
| NO6     |                      |                              |             |
| 3.340   | 0.043                | 0.615                        | 0.774       |
| NO7     |                      |                              |             |
| 3.260   | 0.049                | 0.719                        | 0.756       |
| 3.325   | 0.046                | 0.664                        | 0.776       |
| NO6     |                      |                              |             |
| 3.232   | 0.051                | 0.772                        | 0.756       |

**Table S3:** E(2) energies and charges of the interacting fragments.

|      | O(lp) to $\sigma^*(N-X)$<br>(kcal/mol) | N(lp) to $\sigma^*(O-Y)$<br>(kcal/mol) | OY <sub>1</sub> Y <sub>2</sub> | NX <sub>1</sub> X <sub>2</sub> X <sub>3</sub> | Total |
|------|----------------------------------------|----------------------------------------|--------------------------------|-----------------------------------------------|-------|
|      |                                        |                                        | Charges (au)                   |                                               |       |
| NO1  | 0.28                                   |                                        | 0.00124                        | -0.00124                                      | 0.00  |
| NO2  | 0.39                                   |                                        | 0.00175                        | -0.00175                                      | 0.00  |
| NO3  | 0.47                                   |                                        | 0.00130                        | -0.00130                                      | 0.00  |
| NO4  | 0.47                                   | 0.38                                   | -0.00444                       | 0.00444                                       | 0.00  |
| NO5  | 0.53                                   |                                        | 0.00085                        | -0.00085                                      | 0.00  |
| NO6  | 0.30                                   |                                        | 0.00125                        | -0.00125                                      | 0.00  |
| NO7  | 0.36                                   |                                        | 0.00036                        | -0.00036                                      | 0.00  |
| NO8  | 0.49                                   |                                        | -0.00010                       | 0.00010                                       | 0.00  |
| NO9  | 0.35                                   |                                        | 0.00063                        | -0.00063                                      | 0.00  |
| NO10 | 0.42                                   |                                        | 0.00198                        | -0.00198                                      | 0.00  |
| NO11 | 0.54                                   |                                        | 0.00162                        | -0.00162                                      | 0.00  |
| NO12 | 0.66                                   |                                        | 0.00110                        | -0.00110                                      | 0.00  |
